# Supplementary material for: The DNA/RNA-Dependent RNA Polymerase QDE-1 Generates Aberrant RNA and dsRNA for RNAi in a Process Requiring Replication Protein A and a DNA Helicase
Source: PubMed Central journal article supplement (PMC2950127; doi:10.1371/journal.pbio.1000496), 2010-10-05

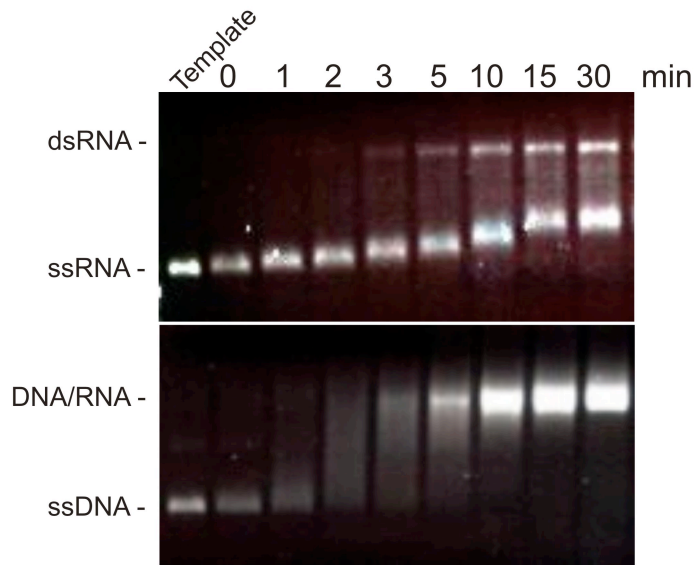

Supplement: pbio.1000496.s002.pdf [file pbio.1000496.s002.pdf]
