# Supplementary material for: The DNA/RNA-Dependent RNA Polymerase QDE-1 Generates Aberrant RNA and dsRNA for RNAi in a Process Requiring Replication Protein A and a DNA Helicase
Source: PubMed Central journal article supplement (PMC2950127; doi:10.1371/journal.pbio.1000496), 2010-10-05

**A**

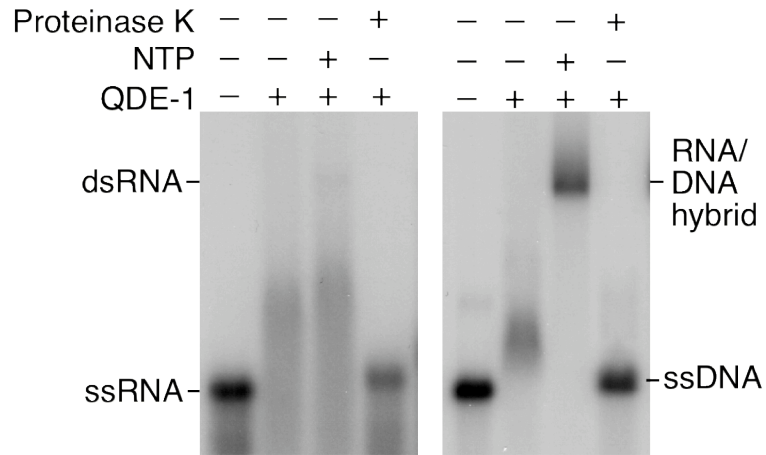

**B**

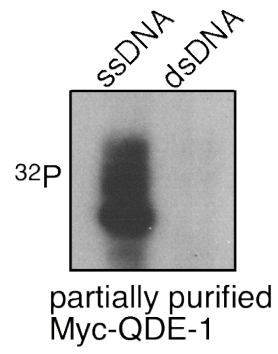

Supplement: pbio.1000496.s003.pdf [file pbio.1000496.s003.pdf]
